# Supplementary material for: Exploring the Links between Sensation & Perception
Source: Oxford University Press journal article supplement (doi:10.1525/abt.2021.83.6.377), 2021-08-01
Supplement: appendix_s3_data_collection_revised_copy_2_august_31_2020.docx [file appendix_s3_data_collection_revised_copy_2_august_31_2020.docx]

**Appendix 3: Data Collection Sheet**

**Experiment A: Flavor with and without olfaction**

**A1: Flavor with olfaction**

| **Cup #** | **Perceived Flavor** | **Degree of Confidence**  **(1 = least confident, 10 = most confident)** |
| --- | --- | --- |
| **1** |  |  |
| **2** |  |  |
| **3** |  |  |
| **4** |  |  |
| **5** |  |  |
| **6** |  |  |

**A2: Flavor without olfaction**

| **Cup #** | **Perceived Flavor** | **Degree of Confidence**  **(1 = least confident, 10 = most confident)** |
| --- | --- | --- |
| **1** |  |  |
| **2** |  |  |
| **3** |  |  |
| **4** |  |  |
| **5** |  |  |
| **6** |  |  |

**Experiment B: Flavor with congruent and incongruent visual cues**

| **Cup #** | **Perceived Flavor** | **Degree of Confidence**  **(1 = least confident, 10 = most confident)** |
| --- | --- | --- |
| **1** |  |  |
| **2** |  |  |
| **3** |  |  |
| **4** |  |  |
| **5** |  |  |
| **6** |  |  |
| **7** |  |  |
| **8** |  |  |
| **9** |  |  |
| **10** |  |  |

**Experiment C: Scent with no visual cues as with congruent and incongruent visual cues**

**C1: Scent Blindfolded**

| **Vial #** | **Name of Scent** | **Degree of Confidence**  **(1-10)** |
| --- | --- | --- |
| **1** |  |  |
| **2** |  |  |
| **3** |  |  |
| **4** |  |  |
| **5** |  |  |
| **6** |  |  |

**C2: Scent with Picture**

| **Vial #** | **Name of Scent** | **Degree of Confidence**  **(1-10)** |
| --- | --- | --- |
| **1** |  |  |
| **2** |  |  |
| **3** |  |  |
| **4** |  |  |
| **5** |  |  |
| **6** |  |  |
| **7** |  |  |

**Experiment D: Create your own Hypothesis**

**Important:**

1. Have the test subject state the perceived flavor as well as the degree of confidence.
2. Do not allow test subject to see the candy prior to completing part three.
3. Complete all three steps with flavor 1 before moving on to flavors 2 and 3

| **Flavor** | **Part 1: Taste while blindfolded without corresponding scent** | **Part 2: Taste while blindfolded with corresponding Scent** | **Part 3: Taste while viewing color prior to tasting (no scent offered)** |
| --- | --- | --- | --- |
| **1** |  |  |  |
| **2** |  |  |  |
| **3** |  |  |  |
